# Supplementary material
Source: PubMed Central journal article supplement (PMC7099698)
Supplement: 41385_2016_BFmi2015130_MOESM368_ESM.pdf [file 41385_2016_BFmi2015130_MOESM368_ESM.pdf]

1 **Supplementary Information**

2  
3 **Rhinovirus inhibits IL-17A and the downstream immune responses in allergic asthma**

4 Anna Graser, PhD<sup>1</sup>, Arif B. Ekici, PhD<sup>2</sup>, Nina Sopol, BSc<sup>1</sup>, Volker O. Melichar, MD  
5 <sup>3</sup>,Theodor Zimmermann, MD<sup>3</sup>, Nikolaos G. Papadopoulos, MD<sup>4</sup>, Stella Taka, PhD<sup>4</sup>, Fulvia  
6 Ferrazzi, PhD<sup>2</sup>, Tytti Vuorinen, PhD, MD<sup>5</sup> and Susetta Finotto, PhD<sup>1\*</sup>

7  
8 <sup>1</sup> Department of Molecular Pneumology, Universitätsklinikum Erlangen, Erlangen, Germany  
9 Germany

10 <sup>2</sup> Institute of Humangenetics, University of Erlangen-Nürnberg, 91054 Erlangen, Germany

11 <sup>3</sup> Paediatric Pneumology-Allergology, Department of Paediatrics and Adolescent Medicine,  
12 Universitätsklinikum Erlangen, Erlangen, Germany

13 <sup>4</sup> Allergy and Clinical Immunology Unit, 2<sup>nd</sup> Pediatric Clinic, National and Kapodistrian  
14 University of Athens, 11527 Athens, Greece

15 <sup>5</sup> Department of Virology, University of Turku, Kiinamylynkatu 13, 20520 Turku, Finland

16  
17  
18  
19 Running title: Rhinovirus down-regulates IL-17A and the downstream anti-viral genes

20  
21  
22  
23  
24  
25  
26 \*Corresponding Author:

27 Susetta Finotto, PhD

28 Laboratory of Cellular and Molecular Lung Immunology

29 Department of Molecular Pneumology, Universitätsklinikum Erlangen, Erlangen, Germany

30 Hartmannstrasse 14

31 91054 Erlangen, Germany

32 Phone: 49-09131- 8535883

33 Fax: 49-09131-8535977

34 Email: susetta.finotto@uk-erlangen.de

35  
36 The authors have no conflict of interest on this study

37

38 **Supplementary Methods**

39

40 **Human study**

41

42 In this study we analysed healthy control children and children with asthma at the age of 4 - 6  
43 years. They were participants within the Europe-wide study PreDicta (Post-infectious immune  
44 reprogramming and its association with persistence and chronicity of respiratory allergic  
45 diseases). This is a multi-centre prospective cohort study carried out in five different centres  
46 in Europe across major cultural and climatic regions. The Department of Molecular  
47 Pneumology, in collaboration with the Paediatric Pneumology-Allergology, Department of  
48 Paediatrics and Adolescent Medicine, Universitätsklinikum Erlangen, Erlangen, Germany is  
49 one of these study centres. The underlying hypothesis of PreDicta is that repeated infections  
50 may reprogram the immune responses towards a chronic inflammation pattern that translates  
51 into disease persistence. Therefore, the host immune responses *in vivo* and *ex vivo* should be  
52 evaluated. To this aim, we and the other study centres established and followed up a cohort of  
53 pre-school children with asthma for two years. At the baseline visit and at the end of the  
54 study, whole blood should be drawn from enrolled children for the isolation of PBMCs.  
55 Furthermore, at these two visits also a nasopharyngeal specimen is to be collected in order to  
56 determine viral infections. The data which are shown here are based on the baseline visit.

57

58 **Nasopharyngeal fluid collection with Swab and Rhinovirus detection**

59

60 For the detection of the Rhinovirus in the upper airways, a nasopharyngeal specimen from  
61 control children and asthmatic children was collected using a per-nasal applicator swab,  
62 which has a tip with flocked soft nylon fiber (E-Swab 482CE, Copan, Italy). Swabs were  
63 passed through the nostrils until resistance was felt and they were slowly rotated for 5 seconds  
64 to allow for mucus absorption. In addition, swabs were also rotated against the mucosa of the  
65 anterior nares before exiting the nose. The nylon tip was eluted by turning into the E-Swab's  
66 medium. The nasopharyngeal fluid was then stored at -80°C until further analysis (see  
67 **Supplemental Figure S1b**). Rhinovirus detection was performed at the Department of  
68 Virology, University of Turku (Finland). Therefore, nucleic acids were extracted using  
69 easyMag extractor (BioMeriex, Marcy l'Etoile, France) from 200 µl of the medium according  
70 to manufacturer's instruction. An *in house* PCR method was used to detect enteroviruses,  
71 rhinoviruses and respiratory syncytial viruses as described earlier<sup>1</sup>. A commercial test kit  
72 (Anyplex™ II RV16 Detection, Seegene, Seoul, Korea) was used to detect 16 respiratory  
73 viruses (adenovirus; influenza A and B viruses; parainfluenza virus 1, 2, 3, and 4; rhinovirus  
74 A, B and C; respiratory syncytial virus A and B; bocavirus 1,2,3,4; coronavirus 229E, NL63  
75 and OC43; metapneumovirus and enteroviruses)

76

## 77 **RNA isolation from whole blood**

78

79 Whole blood from each child of the two cohorts was collected into Tempus<sup>®</sup> Blood RNA  
80 Tubes (life Technologies, Carlsbad, CA, USA) and stored at - 80° C. RNA was isolated with  
81 MagMAX™ for Stabilized Blood Tubes RNA Isolation Kit (ambion<sup>®</sup>, life Technologies,  
82 Carlsbad, CA, USA) according to the manufacturer's instructions. Summarized, RNA was  
83 isolated and purified using RNA binding beads.

84

## 85 **Isolation of human Peripheral Blood Mononuclear cells PBMCs**

86

87 Whole blood was collected into 10 ml venous blood collection tubes with lithium heparin.  
88 Afterwards, the heparinized blood was transferred to a sterile 15 ml tube and diluted with an  
89 equal volume of warm (room temperature) PBS and inverted. After that, the diluted blood was  
90 carefully overlaid on top of Ficoll-Hypaque. After density gradient centrifugation, the layer of  
91 peripheral blood mononuclear cells (PBMCs), which was found between plasma and Ficoll,  
92 was aspirated and transferred to a new sterile 15 ml tube. After washing the cells twice with  
93 RPMI 1640 medium, the cells were used for cell culture (see **Supplemental Figure S1c**).

94

## 95 **Culture of human Peripheral Blood Mononuclear cells PBMCs**

96

97 After isolation, PBMCs were adjusted to a concentration of  $1 \times 10^6$  viable cells / ml in  
98 complete culture medium. Cells were grown in RPMI 1640 medium supplemented with  
99 HEPES 25 mM and L-Glutamine (GIBCO, Invitrogen, Darmstadt, Germany) . Furthermore,  
100 100 IU/ml Penicillin (Sigma-Aldrich, Steinheim, Germany), 100  $\mu$ g/ml Streptomycin (Sigma-  
101 Aldrich, Steinheim, Germany),  $\beta$ -mercaptoethanol (50  $\mu$ M; Sigma-Aldrich, Steinheim,  
102 Germany), 1 % L-Glutamine 200 mM (Sigma-Aldrich, Steinheim, Germany), 1 % MEM  
103 Vitamin (Sigma-Aldrich, Steinheim, Germany), 1% Non Essential aminoacids (Sigma-  
104 Aldrich, Steinheim, Germany), 1 % Sodium Pyruvate (Sigma-Aldrich, Steinheim, Germany)  
105 and 10 % HI-FBS (Sigma-Aldrich, Steinheim, Germany) were added (complete culture  
106 medium). PBMCs were cultured for 24 hours with or for 48 hours without  $\alpha$ CD3 (2  $\mu$ g/ml)

107 and  $\alpha$ CD28 (2  $\mu$ g/ml) antibodies at 37°C and 5 % CO<sub>2</sub>. After 24 hours, supernatants were  
108 carefully removed and stored at - 80°C until further investigations via ELISA as described  
109 below. PBMCs, which were cultured for 48 hours, were diluted in QUIAZOL<sup>®</sup> Lysis Reagent  
110 (Quiagen Sciences, Maryland, USA) and stored at – 80°C until RNA isolation was performed.

111

## 112 **Culture of human lung epithelial A549 cells**

113

114 A549 lung epithelial cells were infected with RV1b as described below. Afterwards, cells  
115 were re-suspended in F12K-NUT Mix (Gibco<sup>®</sup>, life technologies, Carlsbad, CA, USA)  
116 culture medium supplemented with 10 % fetal calf serum, 100 IU/ml Penicillin, 1 % L-  
117 glutamine and 100  $\mu$ g/ml Streptomycin (1 x10<sup>6</sup> cells / ml) and transferred into a culture plate.  
118 Subsequently, different doses of recombinant human IL-17A (Peprotech, Rocky Hill, NJ,  
119 USA) were added. Cells were cultured for 24 hours at 37°C and 5 % CO<sub>2</sub>. Hereafter, cells  
120 were harvested for further analysis.

121

## 122 **Silencing of OAS1 by using siRNA**

123

124 A549 cells were transfected with OAS1 siRNA (Dharmacon<sup>™</sup> ON-TARGETplus SMART  
125 pool, Dharmacon<sup>™</sup>, Thermo Fisher Scientific Biosciences GmbH, St. Leon-Rot, Germany)  
126 according to the manufacturer`s instructions. Therefore, cells were first cultured for 24 hours  
127 (37°C and 5% CO<sub>2</sub>) in culture medium without antibiotics. Afterwards, cells were transfected  
128 using DharmaFECT<sup>™</sup> Transfection Reagents and cultured for further 24 hours (37°C and 5%  
129 CO<sub>2</sub>). Thereafter, cells were infected with RV1b or UV irradiated RV1b and cultured for 24

130 hours in the presence or absence of different concentrations of rhIL-17A (Peprotech, Rocky  
131 Hill, NJ, USA). At the end of the experiment, cells were lysed with PeqGold for following  
132 RNA isolation.

133

#### 134 **Mice**

135

136 Il17a<sup>(-/-)</sup> mice (Yoichiro Iwakura, Center for Experimental Medicine and Systems Biology,  
137 The Institute of Medical Science, The University of Tokyo, Tokyo, Japan)<sup>2</sup> and wild-type  
138 mice on a Balb/c genetic background were used at the age of 6 to 8 weeks. The mice were  
139 bred in the animal facility adjacent to our institute and had free access to food and water.  
140 Furthermore, they were maintained under specific pathogen-free conditions with temperature  
141 control and all experiments were undertaken with the approved license (54-2532.1-2/10 from  
142 the government of Mittelfranken, Bavaria, Germany). One to three independent experiments  
143 were performed and one representative experiment or pooled data are shown.

144

#### 145 **OVA sensitization and challenge**

146

147 Mixed gender of Il17a<sup>(-/-)</sup> and wild-type mice received intraperitoneal (i.p.) injections either  
148 of PBS or of 500 µg/ml ovalbumin (OVA; Calbiochem, Gibbstown, NJ) complexed with  
149 10 % alum (Sigma-Aldrich, Steinheim, Germany) on days 0 and 7 as described previously<sup>3, 4</sup>.  
150 On days 18, 19 and 20 the animals were treated intranasally (i.n.) with PBS alone or OVA in  
151 PBS (2 mg OVA / ml PBS in solution). Mice were sacrificed either on day 20 after the

152 invasive plathysmography or on day 21. Afterwards, bronchoalveolar lavage fluids (BALF),  
153 the whole lung and draining lymph nodes were isolated as described below .

154

### 155 **Airway hyperresponsiveness (AHR)**

156

157 To measure airway reactivity an invasive method was used on day 20 of the protocol. The  
158 invasive plethysmography was performed with a FlexiVent FX1 device (SCIREQ Scientific  
159 Respiratory Equipment) using the FlexiWare 7.2.2 software at least 2 hours after the last  
160 challenge with OVA. The mice were pentobarbital-anesthetized and breathed spontaneously.  
161 After invasive plethysmography, bronchoalveolar lavage of the right lung was performed.

162

### 163 **Collection and analysis of BALF**

164

165 BALF of the right lung was performed by using 0.8 ml saline twice. The collected BALF was  
166 centrifuged at 1500 rpm for 5 min at 4°C. Supernatants were carefully removed and frozen  
167 until further analysis by ELISA. Cell pellets were re-suspended in 1 ml PBS and cells were  
168 counted by using trypan blue solution and a Neubauer chamber. Subsequently, cells were used  
169 to detect eosinophils and neutrophils via fluorescence-activated cell sorting analysis as  
170 described below.

171

### 172 **Histological analysis of murine lung sections**

173

174 Murine lungs were removed, fixed in 10 % formalin-PBS solution, dehydrated and embedded  
175 in paraffin. 5 µm thick sections were stained with Periodic acid-Schiff (PAS) for  
176 quantification of mucosal cells.

177

### 178 **Isolation of lung CD4<sup>+</sup> T cells**

179

180 Lungs from Il17a<sup>(-/-)</sup> and wild-type mice were removed to isolate total cells as previously  
181 described<sup>5</sup>. Purification of CD4<sup>+</sup> T cells was based on positive cell sorting by using magnetic  
182 beads (MACS, Miltenyi Biotec, Bergisch-Gladbach, Germany) according to the  
183 manufacturer`s protocol. The purity of the isolated cells was verified using flow cytometric  
184 analysis as described below. Lung CD4<sup>+</sup> T cells were on the one hand diluted in PeqGold  
185 RNA Pure<sup>TM</sup> to isolate RNA for subsequent qPCR analysis or for Gene Array analysis. On the  
186 other hand, they were infected with RV1b and cultured for 24 h. Afterwards, cells were  
187 collected to isolate RNA.

188

### 189 **Gene Array**

190

191 The gene array was performed at the Core facility of the Institute of Human Genetics in  
192 Erlangen. Briefly, RNA from lung CD4<sup>+</sup> T cells from asthmatic Il17a<sup>(-/-)</sup> and wild-type mice  
193 was isolated as described above and the RNA underwent quality control on Experion<sup>TM</sup> (Bio-  
194 Rad Laboratories, München, Germany) before hybridization on the GeneChip® Gene 1.0 ST  
195 Array (Affymetrix, Santa Clara, USA) as previously described<sup>6</sup>.



196

197 **Isolation of total cells from draining lymph nodes**

198

199 Draining lymph nodes from Il17a<sup>(-/-)</sup> and wild-type mice were removed and transferred to a  
200 15 ml tube containing RPMI 1640 medium. Afterwards, the lymph nodes were transferred and  
201 pushed through a 40 µm sieve. The sieve was then washed with RPMI 1640 medium. After  
202 that, the cell suspension was centrifuged (5 min, 1500 rpm, 4 °C), supernatants were removed  
203 and the cells were re-suspended in RPMI 1640 medium and counted using trypan blue  
204 solution and a Neubauer chamber. These cells were used for RNA isolation as described  
205 below.

206

207 **Infection of lung epithelial cells A549 and murine lung CD4<sup>+</sup> T cells with RV1b**

208

209 A549 cells and lung CD4<sup>+</sup> T cells were infected with Rhinovirus1b (RV1b) suspension, UV  
210 irradiated RV1b or control medium. Specifically, the cells were shook for 1 hour at RT with  
211 RV1b suspension (500 µl RV1b / 1x10<sup>6</sup> cells). RV1b was grown as previously described <sup>7</sup> and  
212 provided to us by National and Kapodistrian University of Athens (Athens, Greece). After  
213 that, medium was added to wash the cells followed by a centrifugation step (300g, 15min,  
214 RT). The supernatant was carefully removed and the cells were re-suspended in culture  
215 medium (1 x 10<sup>6</sup> cells/ml). Afterwards, the cells were cultured for 24 hours.

216

217 **Cell culture of murine cells**

218

219 Cells were adjusted to a concentration of  $1 \times 10^6$  cells/ml and cultured in RPMI 1640 medium  
220 supplemented with 10 % fetal calf serum, 100 IU/ml Penicillin, 1 % L-glutamine and 100 µg/  
221 ml Streptomycin for 24 hours at 37 °C and 5 % CO<sub>2</sub>. Supernatants were carefully removed  
222 and cells were used for RNA isolation.

223

#### 224 **RNA isolation, quantitative real-time PCR and Rhinovirus PCR**

225

226 Total RNA of human PBMCs was extracted by using QUIazol<sup>®</sup> Lysis Reagent (Quiagen  
227 Sciences, Maryland, USA). To isolate RNA from murine cells, PeqGold RNA Pure<sup>™</sup>  
228 (PeqLab, Erlangen, Germany) was utilized. We used for both lysis reagents the same protocol  
229 in order to isolate RNA. Cells were lysed by adding PeqGold RNA Pure<sup>™</sup> or QUIazol<sup>®</sup> Lysis  
230 Reagent to the cells. Afterwards, chloroform was added to the homogenized samples followed  
231 by an incubation phase at 4 °C. After centrifugation (5 min at 12000 x g, 4 °C) the upper  
232 aqueous phase was removed and mixed with chloroform. The samples were centrifuged again  
233 (5 min, 12000 x g, 4 °C) and the resulting upper aqueous phase was removed and isopropyl  
234 alcohol and glycogen (10 mg/ml) were added. After incubation for 15 min at 4 °C, samples  
235 were centrifuged (10 min, 12000 x g, 4 °C) and supernatants were removed. RNA pellets  
236 were washed with 70 % ethanol twice. After a final centrifugation step (5 min, 12000 x g,  
237 4 °C), the excess of ethanol was removed from the RNA pellet by air-drying. Afterwards, the  
238 pellet was re-suspended in sterile nuclease free water and the RNA concentration in each  
239 sample was determined by using a spectrophotometer (Nanodrop, peqlab, Erlangen,  
240 Germany).

241 Total RNA was reverse-transcribed to cDNA using the RevertAid™ First Strand cDNA  
242 Synthesis Kit (Fermentas, St. Leon-Rot, Germany) according to the manufacturer`s  
243 instructions. The resulting template cDNA was amplified by quantitative real-time PCR  
244 (qPCR) using SsoFast EvaGreen Supermix (Bio-Rad Laboratories, München, Germany) and  
245 200 nM primers. The qPCR was performed with a cycle of 2 min 98 °C, 50 cycles at 5 sec  
246 95 °C, 10 sec 60 °C, followed by 5 sec 65 °C and 5 sec 95 °C in a CFX96 Touch Real-Time  
247 PCR Detection System (Bio-Rad Laboratories, Hercules, CA, USA). The primers and  
248 sequences used for mouse were as follows: *mIfnb* (fwd: 5'- CCC TAT GGA GAT GAC GGA  
249 GAA G, rev: 5'- GAG CAT CTC TTG GAT GGC AAA), *mOas1a* (fwd: 5'-TTC CAG CAA  
250 GCC TGA TCC CA-3', rev: 5'- CCC AGC TTC TCC TTA CAC AGT T-3'), *mOas1g* (fwd:  
251 5'- AAT GAT GGT TCC CGA GTG AG-3', rev: 5'- GGC TGT GAT TGG ACA GGA GT-  
252 3') *mLdlr* (fwd. 5'-TTT GGA GGA TGA GAA CCG GC-3', rev: 5'-TGT CGA CTT CTC  
253 TAG GCT GTG-3') and *mBatf* (fwd: 5'-GTT CTG TTT CTC CAG GTC C-3', rev: 5'-GAA  
254 TCG CAT CGC TGC-3'). The mRNA of the genes of interest was normalized using the  
255 mRNA levels of the housekeeping gene *mHprt* (fwd: 5'-GCC CCA AAA TGG TTA AGG  
256 TT-3', rev: 5'-TTG CGC TCA TCT TAG GCT TT-3'). For human analyses the following  
257 primers and sequences were used: *hHPRT* (fwd: 5'- TGA CAC TGG CAA AAC AAT GCA-  
258 3', rev: 5'- GGT CCT TTT CAC CAG CAA GCT-3'), *hIFNB* (fwd: 5'-AGT AGG CGA  
259 CAC TGT TCG TG-3' rev: 5'-AGC CTC CCA TTC AAT TGC CA-3'), *hOAS1* (fwd: 5'-  
260 AGC TGG AAG CCT GTC AAA GA-3', rev: GGT TTA TAG CCG CCA GTC AA-3') )  
261 and *hTBX21* (fwd: 5'-CAG AAT GCC GAG ATT ACT CAG-3', rev: 5'- GGT TGG GTA  
262 GGA GAG GAG AG-3'). The primers and sequences were purchased from Eurofins-MWG-  
263 Operon (Ebersberg, Germany).

264 To verify that the infection with RV1b was successful a PCR was performed as described  
265 previously with some modifications<sup>7, 8</sup>. Therefore, cDNA from infected cells and primers,

266 which are complementary to the antisense RNA at positions 542-557 and 169-185 in the  
267 5' noncoding region of RV1b, called *OL26* (5'-GCA CTT CTG TTT CCC C-3') and *OL27* (5'-  
268 CGG ACA CCC AAA GTA G-3') were used as well as the KAPA2G Fast Ready Mix with  
269 dye (Peqlab, Erlangen, Germany). The thermal cycle consisted of 32 cycles with 94°C for 30  
270 sec, 50°C for 30 sec and 72°C for 2 min so that a 380-bp amplicon was generated. The  
271 samples were analyzed and quantified using the QIAxcel Advanced System (Qiagen GmbH,  
272 Hilden, Germany). RV1b was also analysed by using qPCR. Therefore, the following primers  
273 were used: RV1b (fwd: 5'- CCA TCG CTC ACT ATT CAG CAC-3', rev: 5'- TCT ATC  
274 CCG AAC ACA CTG TCC-3')<sup>9</sup>. The mRNA was normalized to *Hprt* expression.

275

## 276 **ELISA**

277

278 Mouse IL-4, IL-5, IFN-g and total IgE were detected by using OptEIA™ sandwich ELISA  
279 kits from BD Bioscience (Heidelberg, Germany). Mouse IL-13 and IL-17A as well as human  
280 IL-17A was detected by using a DuoSet™ sandwich ELISA kit from R&D Systems  
281 (Wiesbaden, Germany).

282

## 283 **Flow cytometric analysis**

284

285 For surface staining cells were incubated with the particular antibodies for 30 min at 4 °C.  
286 Lung CD4<sup>+</sup> T cells were stained with anti-CD4-PE (BD Pharming, Heidelberg, Germany) to  
287 verify the purity of the isolation. To analyse BAL cells, antibodies against Cd3 (Fic labeled,  
288 eBioscience, Frankfurt, Germany), Ly-6G (PE labeled, BD Bioscience, Heidelberg,

289 Germany), CD45R (PeCy5.5 labeled, eBioscience, Frankfurt, Germany) and CCR-3 (APC-  
290 labeled, BD Bioscience, Heidelberg, Germany) were used. To stain IL-13 producing CD4<sup>+</sup> T  
291 cells, whole lung cells were cultured in RPMI medium at a concentration of 1 x 10<sup>6</sup> cells / ml  
292 over night with OVA (500 µg/ml). On the following day, cells were stimulated with PMA  
293 (1 ng/ml, Sigma-Aldrich,Steinheim, Germany), Ionomycin (1 mM, Sigma-Aldrich, Steinheim,  
294 Germany) and GolgiStop (BD Bioscience, Wiesbaden, Germany). After centrifugation the  
295 cells were incubated with antibodies against Cd4 (Percp conjugated, BD Pharming,  
296 Heidelberg, Germany) for 30 min at 4 °C: Subsequently, the cells were fixed with  
297 fixation/permeabilization solution (eBioscience, Frankfurt, Germany) for 35 min at 4 °C and  
298 then washed with permeabilization buffer (eBioscience, Frankfurt,Germany). Hereafter, the  
299 cells were incubated with antibody against IL-13 conjugated with PE (eBioscience, Frankfurt,  
300 Germany ) for 30 min at 4 °C in permeabilization buffer and washed once. The samples were  
301 acquired by using a FACS-Calibur and analysed with FlowJo.

302

### 303 **Statistical Analysis**

304

305 Differences were evaluated for significance (\* p ≤ 0.05; \*\* p ≤ 0.01, \*\*\* p ≤ 0.001) by using  
306 1-way ANOVA or the Student-two-tailed t test for independent events (Excel, Microsoft,  
307 version 2003; Microsoft, Redmond, Wash), as indicated in the figure legends. Data are given  
308 as mean values ± SEM.

309

## 310 **Supplementary References**

- 311 1. Peltola V, Waris M, Osterback R, Susi P, Ruuskanen O, Hyypia T. Rhinovirus transmission  
312 within families with children: incidence of symptomatic and asymptomatic infections. *The*  
313 *Journal of infectious diseases* 2008; **197**(3): 382-389.
- 314  
315 2. Nakae S, Komiyama Y, Nambu A, Sudo K, Iwase M, Homma I *et al.* Antigen-specific T cell  
316 sensitization is impaired in IL-17-deficient mice, causing suppression of allergic cellular and  
317 humoral responses. *Immunity* 2002; **17**(3): 375-387.
- 318  
319 3. Finotto S, De Sanctis GT, Lehr HA, Herz U, Buerke M, Schipp M *et al.* Treatment of allergic  
320 airway inflammation and hyperresponsiveness by antisense-induced local blockade of GATA-  
321 3 expression. *The Journal of experimental medicine* 2001; **193**(11): 1247-1260.
- 322  
323 4. Finotto S, Hausding M, Doganci A, Maxeiner JH, Lehr HA, Luft C *et al.* Asthmatic changes in  
324 mice lacking T-bet are mediated by IL-13. *International immunology* 2005; **17**(8): 993-1007.
- 325  
326 5. Sauer KA, Scholtes P, Karwot R, Finotto S. Isolation of CD4+ T cells from murine lungs: a  
327 method to analyze ongoing immune responses in the lung. *Nature protocols* 2006; **1**(6):  
328 2870-2875.
- 329  
330 6. Kraft M, Cirstea IC, Voss AK, Thomas T, Goehring I, Sheikh BN *et al.* Disruption of the histone  
331 acetyltransferase MYST4 leads to a Noonan syndrome-like phenotype and hyperactivated  
332 MAPK signaling in humans and mice. *The Journal of clinical investigation* 2011; **121**(9): 3479-  
333 3491.
- 334  
335 7. Tuthill TJ, Papadopoulos NG, Jourdan P, Challinor LJ, Sharp NA, Plumpton C *et al.* Mouse  
336 respiratory epithelial cells support efficient replication of human rhinovirus. *The Journal of*  
337 *general virology* 2003; **84**(Pt 10): 2829-2836.
- 338  
339 8. Papadopoulos NG, Bates PJ, Bardin PG, Papi A, Leir SH, Fraenkel DJ *et al.* Rhinoviruses infect  
340 the lower airways. *The Journal of infectious diseases* 2000; **181**(6): 1875-1884.
- 341  
342 9. Chen Y, Hamati E, Lee PK, Lee WM, Wachi S, Schnurr D *et al.* Rhinovirus induces airway  
343 epithelial gene expression through double-stranded RNA and IFN-dependent pathways.  
344 *American journal of respiratory cell and molecular biology* 2006; **34**(2): 192-203.
- 345  
346 10. Hornung V, Hartmann R, Ablasser A, Hopfner KP. OAS proteins and cGAS: unifying concepts  
347 in sensing and responding to cytosolic nucleic acids. *Nature reviews Immunology* 2014; **14**(8):  
348 521-528.
- 349  
350 11. Sadler AJ, Williams BR. Interferon-inducible antiviral effectors. *Nature reviews Immunology*  
351 2008; **8**(7): 559-568.

352

- 353 12. Silverman RH. Viral encounters with 2',5'-oligoadenylate synthetase and RNase L during the  
354 interferon antiviral response. *Journal of virology* 2007; **81**(23): 12720-12729.
- 355  
356 13. Zhao L, Jha BK, Wu A, Elliott R, Ziebuhr J, Gorbalenya AE *et al.* Antagonism of the interferon-  
357 induced OAS-RNase L pathway by murine coronavirus ns2 protein is required for virus  
358 replication and liver pathology. *Cell host & microbe* 2012; **11**(6): 607-616.
- 359

360 **Supplementary Figure Legends**

361

362 **Supplementary Figure S1: Determination of Rhinovirus in the Nasal pharyngeal fluid**  
363 **and isolation of Peripheral Blood Mononuclear Cells (PBMC) from whole blood**

364 (a) Experimental protocol of sample collection within the PreDicta study (b) Collection of  
365 Nasal pharyngeal Swab samples from control children and asthmatic children and  
366 determination of Rhinovirus. (c) Isolation of PBMCs from whole blood samples of healthy  
367 and asthmatic children. (d and e) mRNA expression of *IFNB* (d) and *TBX21* (e) after  
368 culturing PBMCs for 48 hours. (f) Detection of IL-17A in the supernatants of PBMCs after  
369 cell culture for 24 hours in presence of  $\alpha$ CD3 and  $\alpha$ CD28 antibodies. (g) *OAS1* gene  
370 expression in PBMCs after cell culture for 48 hours. (n = 8-22)

371



372 **Supplementary Figure S2: IL-17A induces *OAS1* and inhibits *RV1b* mRNA expression**  
373 **in RV infected A549 cells**

374 A549 cells were first transfected with OAS1 or non-targeting (NT) siRNA and afterwards  
375 infected with RV1b or UV-RV1b. The infected cells were cultured for 24 h with increasing  
376 doses (0 / 6 / 12.5 / 25 ng/ml) of rhIL17A (n=3 per group). Data are given as mean values  $\pm$   
377 SEM. \*  $p \leq 0.05$ , \*\*\*  $p \leq 0.001$  (Student t test).

378

379 **Supplementary Figure S3: Up-regulation of inflammatory markers in wild-type and**  
380 **Il17a<sup>(-/-)</sup> mice**

381

382 (a) Concentration of IL-17A in SN of lung CD4<sup>+</sup> T cells (n=3 per group) (b) AHR was  
383 measured by using invasive plethysmography in naive and asthmatic mice (n=3). (c-f)  
384 Analysis of IL-4 (c, n= 14-21), IFN-g (d, n=12-20), IL-5 (e, n=3-8) and IL-13 (f, n=3-5) in  
385 the BALF of naïve and OVA-sensitized wild-type and Il17a<sup>(-/-)</sup> mice (g) (h) \*  $p \leq 0.05$ , \*\*  $p \leq$   
386 0.01, \*\*\*  $p \leq 0.001$  (a-f: ANOVA).

387

388 **Supplementary Figure S4: Decreased Neutrophilia and mucus production in the airways**

389 **of OVA-sensitized Il17a<sup>(-/-)</sup> mice.** (a) Detection of eosinophils in BALF via fluorescence-  
390 activated cell sorting (n=7-13). (b) Detection of neutrophils via fluorescence-activated cell  
391 sorting analysis (n=10-17 per group). (c) Periodic acid shiff (PAS) staining of murine lung  
392 sections. (n=20-42 bronchi per group). (d) IgE concentration in the serum of wild-type and  
393 Il17a deficient mice (n= 11-16). (e) *Batf* mRNA expression in lung CD4<sup>+</sup> T cells of naïve

394 mice and after treatment with OVA (n=3-5). **(d)** Data are given as mean values  $\pm$  SEM. \*  $p \leq$   
395 0.05, \*\*\*  $p \leq 0.001$  (a, c, d: ANOVA; b,e: Student t test).

396

397 **Supplementary Figure S5: Inhibition of anti-viral Oas1 genes in murine lung CD4<sup>+</sup> T**  
398 **cells in Il17a<sup>(-/-)</sup> mice in asthma**

399 **(a, b)** CD4<sup>+</sup> T cells were isolate from total lungs of OVA-sensitized wild-type and Il17a<sup>(-/-)</sup>  
400 mice 24 hours after the last allergen challenge. After RNA isolation, a gene array was  
401 performed. Heat map **(a)** and graphical representation **(b)** of genes associated with anti-viral  
402 response (n=3). **(c)** Whole lung cells were analysed by flow cytometry for IL-13<sup>+</sup> CD4<sup>+</sup> cells  
403 (n=3). **(d-e)** Real time PCR of *Oas1a* **(d)** and *Oas1g* **(e)** from lung CD4<sup>+</sup> T cells isolated from  
404 naïve and OVA-sensitized wild-type and Il17a<sup>(-/-)</sup> mice (n=3-5). **(f-g)** Gene expression of  
405 *Oas1g* in total lung **(f, n=7-8)** or lymph nodes **(g, n=3-4)** of naïve and asthmatic wt and  
406 Il17a<sup>(-/-)</sup> mice. *Ifnb* mRNA expression in lung CD4<sup>+</sup> T cells of wt and Il17a<sup>(-/-)</sup> mice (n=3).

407 \*  $p \leq 0.05$ , \*\*  $p \leq 0.01$ , \*\*\*  $p \leq 0.001$  (ANOVA ).

408

409 **Supplementary Figure S6: Successful infection of lung CD4<sup>+</sup> T cells with RV1b**

410 Detection of viral infection using PCR analysis and primers, which are complementary to the  
411 antisense RNA at positions 542-557 and 169-185 in the 5' noncoding region of RV1b.

412

413 **Supplementary Tables**

414

415 **Supplementary Table S1: Clinical data of the two cohorts of children analysed in this study**

416

| group / patient | age | gender | asthma severity     | asthma phenotype            | asthma treatment      | asthma control       |
|-----------------|-----|--------|---------------------|-----------------------------|-----------------------|----------------------|
| <b>controls</b> |     |        |                     |                             |                       |                      |
| C1              | 6   | male   | -                   | -                           | -                     | -                    |
| C2              | 5   | male   | -                   | -                           | -                     | -                    |
| C3              | 5   | female | -                   | -                           | -                     | -                    |
| C4              | 6   | male   | -                   | -                           | -                     | -                    |
| C5              | 6   | male   | -                   | -                           | -                     | -                    |
| C6              | 6   | male   | -                   | -                           | -                     | -                    |
| C7              | 4   | male   | -                   | -                           | -                     | -                    |
| C8              | 4   | male   | -                   | -                           | -                     | -                    |
| C9              | 5   | female | -                   | -                           | -                     | -                    |
| C10             | 4   | male   | -                   | -                           | -                     | -                    |
| C11             | 4   | female | -                   | -                           | -                     | -                    |
| C12             | 4   | male   | -                   | -                           | -                     | -                    |
| C13             | 4   | male   | -                   | -                           | -                     | -                    |
| C14             | 5   | female | -                   | -                           | -                     | -                    |
| C15             | 5   | female | -                   | -                           | -                     | -                    |
| C16             | 4   | male   | -                   | -                           | -                     | -                    |
| C17             | 4   | male   | -                   | -                           | -                     | -                    |
| <b>Mean</b>     | 4,8 |        |                     |                             |                       |                      |
| <b>SEM</b>      | 0,2 |        |                     |                             |                       |                      |
| <b>cases</b>    |     |        |                     |                             |                       |                      |
| A1              | 4   | female | mild persistent     | unresolved                  | steroid + non-steroid | partially controlled |
| A2              | 6   | male   | mild persistent     | allergen                    | steroid + non-steroid | controlled           |
| A3              | 4   | male   | intermittent        | unresolved                  | steroid + non-steroid | partially controlled |
| A4              | 5   | male   | intermittent        | allergen / virus            | steroid + non-steroid | partially controlled |
| A5              | 4   | female | n.a.                | allergen / virus            | steroid               | partially controlled |
| A6              | 6   | female | intermittent        | virus                       | non-steroid           | partially controlled |
| A7              | 5   | male   | mild persistent     | virus / exercise            | steroid + non-steroid | controlled           |
| A8              | 5   | female | moderate persistent | allergen / virus            | steroid               | uncontrolled         |
| A9              | 6   | female | intermittent        | allergen / virus / exercise | steroid               | controlled           |
| A10             | 5   | male   | intermittent        | virus                       | -                     | controlled           |
| A11             | 4   | male   | intermittent        | virus                       | steroid + non-steroid | partially controlled |
| A12             | 5   | male   | mild persistent     | unresolved                  | steroid               | partially controlled |
| A13             | 5   | female | intermittent        | unresolved                  | steroid               | partially controlled |
| A14             | 4   | male   | moderate persistent | exercise                    | steroid + non-steroid | partially controlled |
| A15             | 4   | male   | intermittent        | virus                       | steroid + non-steroid | controlled           |
| A16             | 4   | male   | intermittent        | virus                       | non-steroid           | controlled           |
| A17             | 5   | male   | intermittent        | virus                       | -                     | controlled           |
| A18             | 4   | male   | intermittent        | virus                       | steroid + non-steroid | controlled           |
| A19             | 5   | female | intermittent        | exercise                    | non-steroid           | controlled           |
| A20             | 5   | female | mild persistent     | virus                       | steroid + non-steroid | uncontrolled         |
| <b>Mean</b>     | 4,8 |        |                     |                             |                       |                      |
| <b>SEM</b>      | 0,2 |        |                     |                             |                       |                      |

417

418

419 **Supplementary Table S2:** FEV1 and respiratory infections in the 12 months before  
 420 recruitment of the two cohorts of children analysed in this study

| group / patient | FEV1 [%] | RV detection in NPF | upper respiratory infections during last 12 months [number] | lower respiratory infections during last 12 months [number] |
|-----------------|----------|---------------------|-------------------------------------------------------------|-------------------------------------------------------------|
| <b>controls</b> |          |                     |                                                             |                                                             |
| C1              | 77       | -                   | 3                                                           | 0                                                           |
| C2              | 118      | -                   | 2                                                           | 0                                                           |
| C3              | 84       | -                   | 5                                                           | 0                                                           |
| C4              | 105      | -                   | 1                                                           | 0                                                           |
| C5              | 87       | -                   | 1                                                           | 0                                                           |
| C6              | 111      | -                   | 4                                                           | 0                                                           |
| C7              | 109      | -                   | 7                                                           | 0                                                           |
| C8              | 121      | -                   | 0                                                           | 0                                                           |
| C9              | 121      | +                   | 5                                                           | 0                                                           |
| C10             | 110      | +                   | 5-6                                                         | 0                                                           |
| C11             | 111      | +                   | 2                                                           | 1                                                           |
| C12             | n.a.     | +                   | 3                                                           | 0                                                           |
| C13             | 100      | +                   | 3                                                           | 0                                                           |
| C14             | 112      | +                   | 4                                                           | 0                                                           |
| C15             | 119      | +                   | 3                                                           | 0                                                           |
| C16             | 113      | +                   | 2                                                           | 0                                                           |
| C17             | 123      | +                   | 10                                                          | 0                                                           |
| <b>Mean</b>     | 107,6    |                     |                                                             |                                                             |
| <b>SEM</b>      | 3,5      |                     |                                                             |                                                             |
| <b>cases</b>    |          |                     |                                                             |                                                             |
| A1              | 95       | -                   | n.a.                                                        | 0                                                           |
| A2              | 128      | -                   | 4                                                           | 0                                                           |
| A3              | 102      | -                   | 5                                                           | 0                                                           |
| A4              | 143      | -                   | 2                                                           | 10                                                          |
| A5              | 115      | -                   | 7-8                                                         | 1                                                           |
| A6              | 98       | -                   | 10                                                          | 2                                                           |
| A7              | 96       | -                   | 12                                                          | 1                                                           |
| A8              | 92       | -                   | 5                                                           | 0                                                           |
| A9              | 111      | -                   | 4                                                           | 0                                                           |
| A10             | 88       | -                   | 2-3                                                         | 3                                                           |
| A11             | 71       | -                   | 6                                                           | 0                                                           |
| A12             | n.a.     | +                   | 5                                                           | 5                                                           |
| A13             | 129      | +                   | 2                                                           | 0                                                           |
| A14             | 115      | +                   | 4                                                           | 1                                                           |
| A15             | 99       | +                   | 3                                                           | 0                                                           |
| A16             | 87       | +                   | 10                                                          | 1                                                           |
| A17             | 101      | +                   | 4                                                           | 0                                                           |
| A18             | 77       | +                   | 6                                                           | 3                                                           |
| A19             | 98       | +                   | 1                                                           | 0                                                           |
| A20             | 69       | +                   | 4-6                                                         | 6                                                           |
| <b>Mean</b>     | 100,7    |                     |                                                             |                                                             |
| <b>SEM</b>      | 4,5      |                     |                                                             |                                                             |

421

422

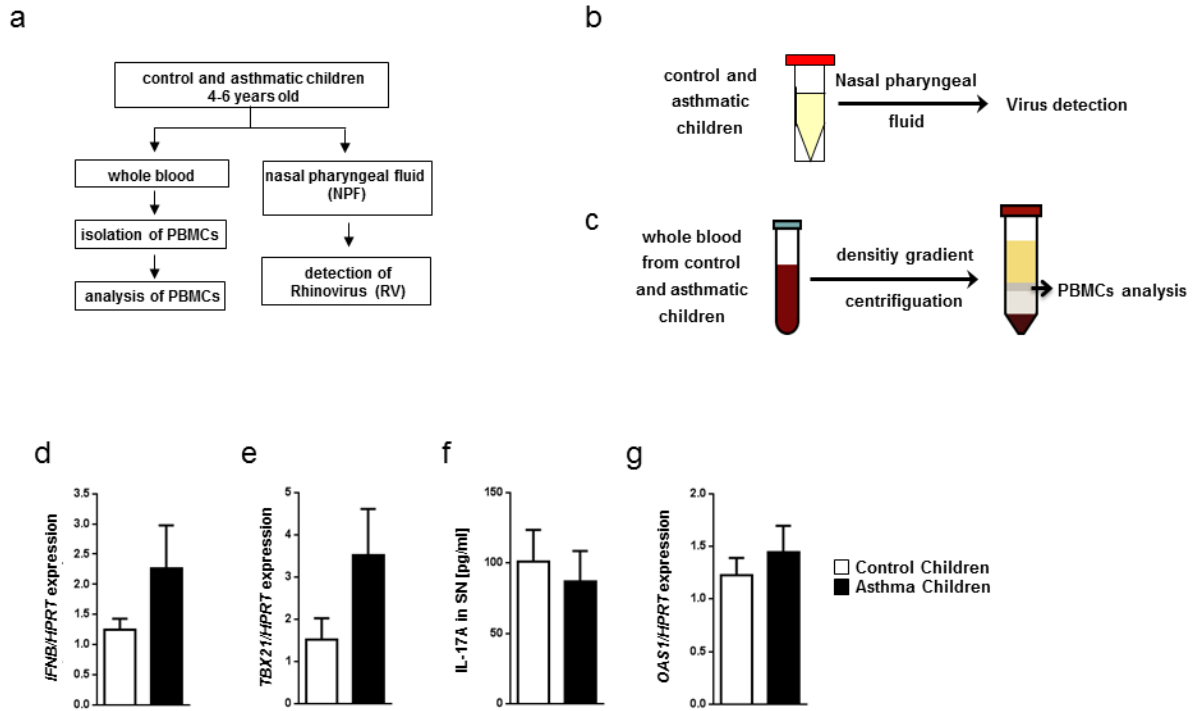

423

Supplementary Figure S1

424

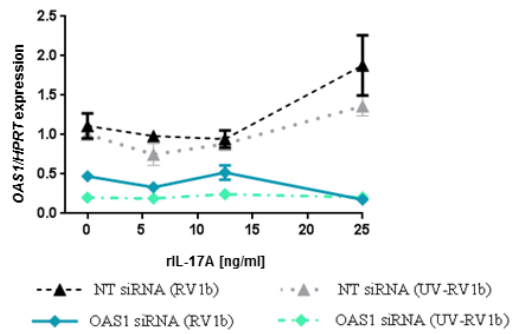

425

Supplementary Figure S2

426

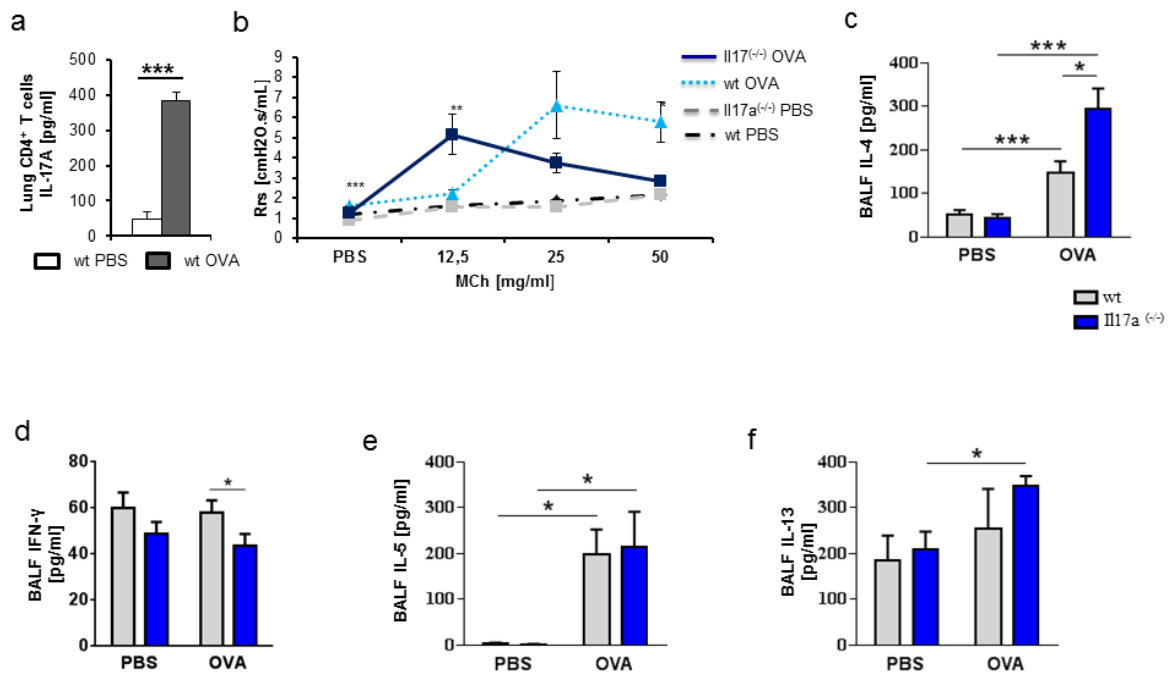

427

428

Supplementary Figure S3

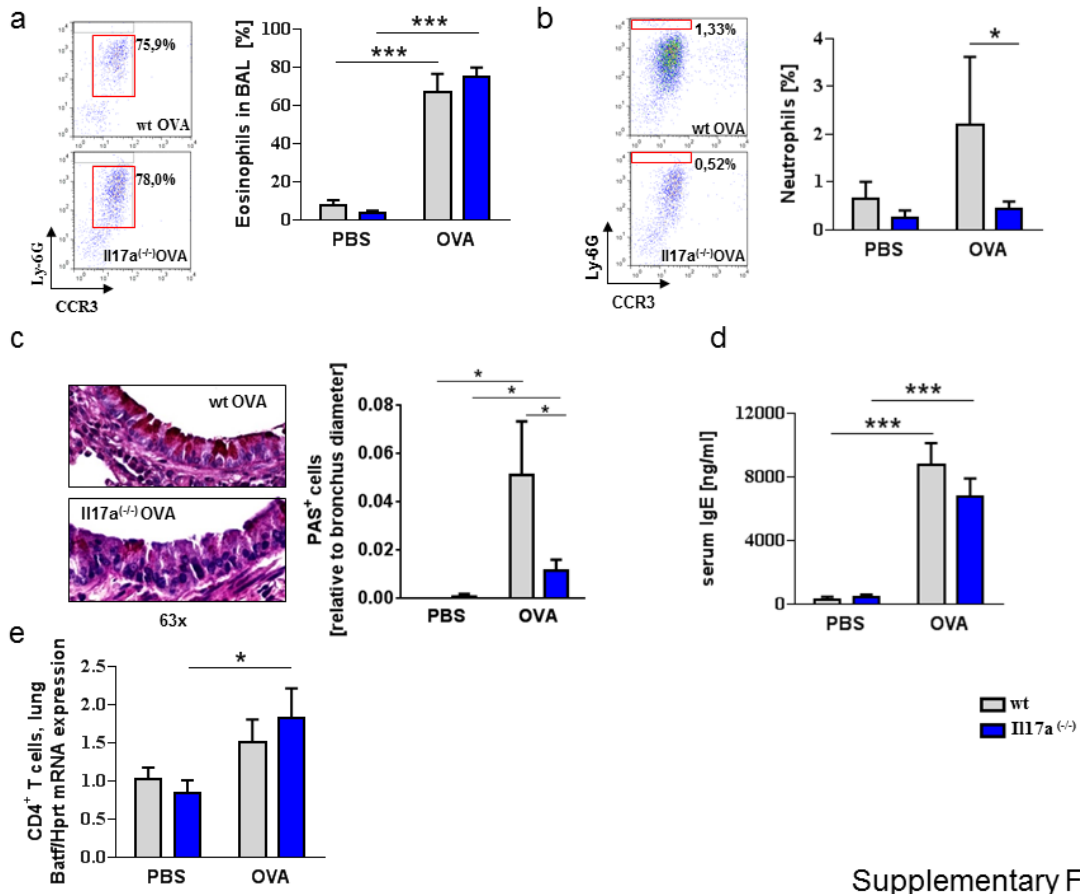

Supplementary Figure S4

429

430

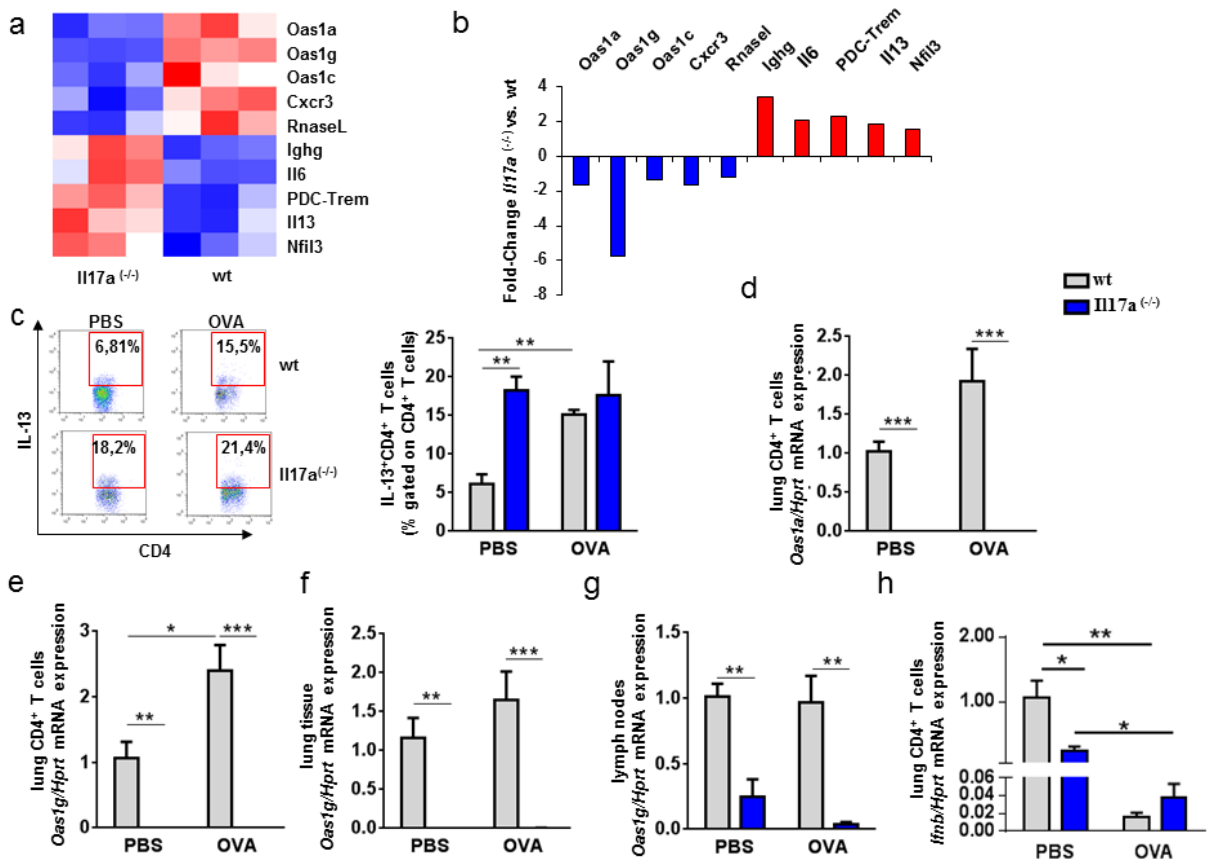

Supplementary Figure S5

431

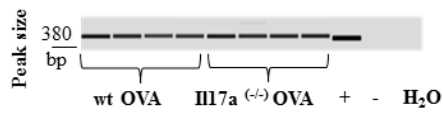

432

Supplementary Figure S6

24
